# Supplementary material for: Early Detection and Monitoring of Gastrointestinal Infections Using Syndromic Surveillance: A Systematic Review
Source: MDPI journal article supplement (doi:10.3390/ijerph21040489), 2024-04-17
Supplement: s1 [file s1]

## Supplementary Materials

**Supplementary Table S1:** search strings used in the systematic review

| <i>Search string: PubMed</i>                                                                                                                                                                                                                                                                                                                                                                                                                                                                                                                                                                                                                                                                                | <i>Search string: Ovid/Medline</i>                                                                                                                                                                                                                                                                                                         | <i>Search string: Scopus</i>                                                                                                                                                                                                                                                                                                                                                                                                             | <i>Search string: CINAHL</i>                                                                                                                                                                                                                                        |
|-------------------------------------------------------------------------------------------------------------------------------------------------------------------------------------------------------------------------------------------------------------------------------------------------------------------------------------------------------------------------------------------------------------------------------------------------------------------------------------------------------------------------------------------------------------------------------------------------------------------------------------------------------------------------------------------------------------|--------------------------------------------------------------------------------------------------------------------------------------------------------------------------------------------------------------------------------------------------------------------------------------------------------------------------------------------|------------------------------------------------------------------------------------------------------------------------------------------------------------------------------------------------------------------------------------------------------------------------------------------------------------------------------------------------------------------------------------------------------------------------------------------|---------------------------------------------------------------------------------------------------------------------------------------------------------------------------------------------------------------------------------------------------------------------|
| <p>("GI activity" OR "gastrointestinal infection" OR "gastroenteritis" OR "Diarrhoea" OR "Vomiting" OR "diarrhea" OR "vomit") AND ("Syndrome surveillance" OR "Syndromic Surveillance" or "Real time surveillance" or "real-time surveillance")</p> <p>This search string was altered to fit the syntax appropriate for each database. In Medline, this was:</p> <p>Gastrointestinal Diseases/ or Gastrointestinal infection.mp.</p> <p>GI activity.mp.</p> <p>Diarrh?ea.mp.</p> <p>Vomiting/ or vomit.mp.</p> <p>Syndromic surveillance.mp.</p> <p>real?time surveillance.mp.</p> <p>real time surveillance.mp.</p> <p>early detection.mp.</p> <p>1 or 2 or 3 or 4</p> <p>5 or 6 or 7</p> <p>10 and 11</p> | <p>Gastrointestinal Diseases/ or Gastrointestinal infection.mp.</p> <p>GI activity.mp.</p> <p>Diarrh?ea.mp.</p> <p>Vomiting/ or vomit.mp.</p> <p>Syndromic surveillance.mp.</p> <p>real?time surveillance.mp.</p> <p>real time surveillance.mp.</p> <p>early detection.mp.</p> <p>1 or 2 or 3 or 4</p> <p>5 or 6 or 7</p> <p>10 and 11</p> | <p>Syndromic AND Surveillance AND Gastrointestinal</p> <p>Syndromic AND Surveillance AND Diarrhoea</p> <p>(real-time AND surveillance ) ) AND ( gastrointestinal AND infection )</p> <p>("GI activity" OR "gastrointestinal infection" OR "gastroenteritis" OR "Diarrhoea" OR "Vomiting" OR "diarrhea" OR "vomit") AND ("Syndrome surveillance" OR "Syndromic Surveillance" or "Real time surveillance" or "real-time surveillance")</p> | <p>Syndromic surveillance in title / all text</p> <p>AND Gastrointestinal infection in all text</p> <p>AND diarrhoea or diarrhea in all text</p> <p>Real-time surveillance</p> <p>And gastrointestinal</p> <p>Syndromic surveillance</p> <p>And gastroenteritis</p> |
| <b>Search results = 161</b>                                                                                                                                                                                                                                                                                                                                                                                                                                                                                                                                                                                                                                                                                 | <b>Search results = 266</b>                                                                                                                                                                                                                                                                                                                | <b>Search results = 1,286</b>                                                                                                                                                                                                                                                                                                                                                                                                            | <b>Search results = 104</b>                                                                                                                                                                                                                                         |

**Supplementary Table S2:** surveillance systems included in the systematic review illustrating the primary aim/goal of the system

| Author/year      | Primary aim of syndromic surveillance system                                                                                                                                                                           |
|------------------|------------------------------------------------------------------------------------------------------------------------------------------------------------------------------------------------------------------------|
| Armistead 2022   | To examine trends in outpatient medical care seeking behavior for acute gastroenteritis (AGE) in 2020 compared with the that of previous 3 years.                                                                      |
| Ahn 2010         | To compare the data from the emergency department syndromic surveillance system of Korea in detection and reporting of acute diarrheal syndrome (mass type) with the data from the Korea Food and Drug Administration. |
| Balter 2005      | To review diarrhea and vomiting syndromes and to determine if any unreported outbreaks were detected.                                                                                                                  |
| Bounoure 2020    | syndromic surveillance of medicalized acute gastroenteritis mAGE.                                                                                                                                                      |
| Brottet 2015     | To identify and monitor outbreaks of influenza, gastroenteritis, and chicken pox, and to characterize circulating influenza viruses.                                                                                   |
| Caillère 2013    | To investigate a major outbreak of gastroenteritis in Réunion Island in 2012 and identify the presence of G12 rotavirus on the island.                                                                                 |
| Cho 2021         | To analyze the trend and characteristics of acute viral gastroenteritis.                                                                                                                                               |
| Delespierre 2018 | To assess influenza and acute gastroenteritis (AGE) syndromic data.                                                                                                                                                    |
| Donaldson 2022   | To determine if cases and outbreaks in children could provide an early warning of seasonal norovirus before cases start increasing in older, more vulnerable age groups.                                               |
| Edelstein 2014   | To assess norovirus surveillance and response in Sweden.                                                                                                                                                               |
| Enserink 2015    | To estimate the proportion of day-care attendees experiencing gastroenteritis that could be attributed to a range of enteropathogens circulating in day care in the Netherlands in 2010–2013.                          |
| Flamand 2008     | To assess a large part of episodes of illness that do not require hospital admissions or the identification of an etiologic agent.                                                                                     |
| Gerstel 2009     | To identify the responsible organisms for diarrhoeal illnesses.                                                                                                                                                        |
| Greene 2012      | To identify potential outbreaks generated from Electronic Medical Records.                                                                                                                                             |
| Heffernan 2004   | Routinely collected chief complaint information in emergency department to detect disease outbreaks early.                                                                                                             |
| Henry 2004       | To assess whether nurse advice hotline data would be able to predict the syndrome diagnoses made during subsequent Kaiser Permanente of the Mid-Atlantic States syndromic outpatient office visits.                    |
| Hripcsak 2009    | To identify influenza-like illness and gastrointestinal infectious disease in ambulatory electronic health record data from a network of community health centers.                                                     |
| Hughes 2020      | National ED syndromic surveillance system to assess the continued impact of the UK national RV programme.                                                                                                              |
| Kim 2023         | To analyze the trend and characteristics of acute viral gastroenteritis.                                                                                                                                               |
| Love 2023        | To establish the impact of the COVID-19 outbreak response on gastrointestinal (GI) infection trends                                                                                                                    |
| Loveridge 2010   | To investigate whether NHS Direct vomiting calls can be used as a reliable indicator of norovirus activity and, if so, whether the increase in calls precedes the epidemic of hospital outbreaks.                      |
| Lucaccioni 2021  | To identify hospital episodes, deaths of rotavirus and acute gastroenteritis.                                                                                                                                          |
| Muchaal 2015     | To assess the timeliness and accuracy of pharmacy sales data for both respiratory and gastrointestinal infections and to determine its utility in supporting the surveillance of gastrointestinal illness.             |
| Nisavanh 2022    | To describe trends in acute gastroenteritis indicators.                                                                                                                                                                |
| Olson 2020       | To analyze the response of rotavirus dynamics to infant vaccination.                                                                                                                                                   |
| Ondrikova 2023   | To predict norovirus activity across a range of age groups across England.                                                                                                                                             |
| Rodriguez 2007   | To characterize emergency department (ED) visits for gastroenteritis by season and age and develop a predictive model.                                                                                                 |
| Smith 2007       | An established primary care-derived database, that provide timely and local information on trends in community illness and prescribing.                                                                                |
| Tanabe 2018      | The benefits of the (Nursery) School Absenteeism Surveillance System, (N)SASSy, as an infection control measure by a public health center.                                                                             |

**Supplementary Table S3:** quality assessment of studies using the Joanna Briggs Institute (JBI) critical appraisal checklist for qualitative research

| Study          | Is there agreement between the stated philosophical perspective and the research methodology? | Is there agreement between the research methodology and the research question or objectives? | Is there agreement between the research methodology and the methods used to collect data? | Is there agreement between the research methodology and the representation and analysis of data? | Is there agreement between the research methodology and the interpretation of results? | Is there a statement locating the researcher culturally or theoretically? | Is the influence of the researcher on the research, and vice-versa, addressed? | Are participants, and their voices, adequately represented? | Is the research ethical according to current criteria or, for recent studies, and is there evidence of ethical approval by an appropriate body? | Do the conclusions drawn in the research report flow from the analysis, or interpretation, of the data? | Overall appraisal |
|----------------|-----------------------------------------------------------------------------------------------|----------------------------------------------------------------------------------------------|-------------------------------------------------------------------------------------------|--------------------------------------------------------------------------------------------------|----------------------------------------------------------------------------------------|---------------------------------------------------------------------------|--------------------------------------------------------------------------------|-------------------------------------------------------------|-------------------------------------------------------------------------------------------------------------------------------------------------|---------------------------------------------------------------------------------------------------------|-------------------|
| Armistead 2022 | ✓                                                                                             | ✓                                                                                            | ✓                                                                                         | ✓                                                                                                | ✓                                                                                      | X                                                                         | X                                                                              | X                                                           | ✓                                                                                                                                               | ✓                                                                                                       | High              |
| Ahn 2010       | ✓                                                                                             | ✓                                                                                            | ✓                                                                                         | ✓                                                                                                | ✓                                                                                      | X                                                                         | X                                                                              | ✓                                                           | X                                                                                                                                               | ✓                                                                                                       | High              |
| Balter 2005    | ✓                                                                                             | ✓                                                                                            | ✓                                                                                         | ✓                                                                                                | ✓                                                                                      | X                                                                         | X                                                                              | X                                                           | X                                                                                                                                               | ✓                                                                                                       | Medium            |
| Bounoure 2020  | ✓                                                                                             | ✓                                                                                            | X                                                                                         | X                                                                                                | ✓                                                                                      | X                                                                         | X                                                                              | X                                                           | X                                                                                                                                               | ✓                                                                                                       | Low               |
| Brottet 2015   | ✓                                                                                             | X                                                                                            | ✓                                                                                         | X                                                                                                | ✓                                                                                      | X                                                                         | X                                                                              | X                                                           | X                                                                                                                                               | ✓                                                                                                       | Low               |
| Caillère 2013  | ✓                                                                                             | X                                                                                            | ✓                                                                                         | ✓                                                                                                | ✓                                                                                      | X                                                                         | X                                                                              | X                                                           | X                                                                                                                                               | ✓                                                                                                       | Medium            |
| Cho 2021       | ✓                                                                                             | ✓                                                                                            | ✓                                                                                         | ✓                                                                                                | ✓                                                                                      | X                                                                         | X                                                                              | ✓                                                           | ✓                                                                                                                                               | ✓                                                                                                       | High              |

|                     |   |   |   |   |   |   |   |   |   |   |        |
|---------------------|---|---|---|---|---|---|---|---|---|---|--------|
| Delespierre<br>2018 | ✓ | ✓ | ✓ | ✓ | ✓ | X | X | ✓ | ✓ | ✓ | High   |
| Donaldson<br>2022   | ✓ | ✓ | ✓ | ✓ | ✓ | X | X | ✓ | ✓ | ✓ | High   |
| Edelstein<br>2014   | ✓ | ✓ | ✓ | ✓ | ✓ | X | X | ✓ | X | ✓ | High   |
| Enserink<br>2015    | ✓ | ✓ | ✓ | X | ✓ | X | X | ✓ | ✓ | ✓ | High   |
| Flamand<br>2008     | ✓ | ✓ | ✓ | ✓ | ✓ | X | X | ✓ | X | ✓ | High   |
| Gerstel<br>2009     | ✓ | ✓ | ✓ | ✓ | ✓ | X | X | X | X | ✓ | Medium |
| Greene<br>2012      | ✓ | ✓ | ✓ | ✓ | ✓ | X | X | X | X | ✓ | Medium |
| Heffernan<br>2004   | ✓ | X | ✓ | ✓ | ✓ | X | X | X | X | ✓ | Medium |
| Henry<br>2004       | ✓ | ✓ | ✓ | ✓ | ✓ | X | X | X | X | ✓ | Medium |
| Hripcsak<br>2009    | ✓ | X | X | X | X | X | X | X | X | X | Low    |
| Hughes<br>2010      | ✓ | ✓ | ✓ | ✓ | ✓ | X | X | ✓ | ✓ | ✓ | High   |
| Kim 2023            | ✓ | ✓ | ✓ | ✓ | ✓ | X | X | ✓ | ✓ | ✓ | High   |
| Love 2022           | ✓ | ✓ | ✓ | ✓ | ✓ | X | X | ✓ | ✓ | ✓ | High   |
| Loveridge<br>2010   | ✓ | ✓ | ✓ | ✓ | ✓ | X | X | ✓ | X | ✓ | High   |
| Lucaccioni<br>2021  | ✓ | ✓ | ✓ | ✓ | ✓ | X | X | X | X | ✓ | Medium |
| Muchaal<br>2015     | ✓ | ✓ | ✓ | ✓ | ✓ | X | X | X | X | ✓ | Medium |

|                   |   |   |   |   |   |   |   |   |   |   |        |
|-------------------|---|---|---|---|---|---|---|---|---|---|--------|
| Nisavanh<br>2022  | ✓ | ✓ | ✓ | ✓ | ✓ | X | X | X | ✓ | ✓ | High   |
| Olson 2020        | ✓ | X | X | ✓ | ✓ | X | X | X | X | ✓ | Low    |
| Ondrikova<br>2023 | ✓ | ✓ | ✓ | ✓ | ✓ | X | X | ✓ | ✓ | ✓ | High   |
| Rodriguez<br>2007 | ✓ | ✓ | ✓ | ✓ | ✓ | X | X | X | X | ✓ | Medium |
| Smith 2007        | ✓ | ✓ | ✓ | ✓ | ✓ | X | X | X | X | ✓ | Medium |
| Tanabe<br>2018    | ✓ | ✓ | ✓ | ✓ | ✓ | X | X | X | ✓ | ✓ | High   |
